# Supplementary material
Source: PubMed Central journal article supplement (PMC5055477)
Supplement: 13280_2016_779_MOESM1_ESM.pdf [file 13280_2016_779_MOESM1_ESM.pdf]

*Ambio*

**Electronic Supplementary Material**

*This supplementary material has not been peer-reviewed*

**Title:** AvianBuffer: an interactive tool for characterising and managing wildlife fear responses

Patrick-Jean Guay<sup>1</sup>, Wouter F.D. van Dongen<sup>1</sup>, Randall W. Robinson<sup>1</sup>, Daniel T. Blumstein<sup>2</sup> and Michael A. Weston<sup>3,4</sup>

<sup>1</sup>*Applied Ecology Research Group and Institute for Sustainability and Innovation, College of Engineering and Science, Victoria University – Footscray Park Campus, PO Box 14428, Melbourne MC, VIC, Australia 8001.*

<sup>2</sup>*Department of Ecology and Evolutionary Biology, University of California, Los Angeles, CA, USA*

<sup>3</sup>*Centre for Integrative Ecology, School of Life and Environmental Sciences, Faculty of Science, Engineering and the Built Environment, Deakin University, 221 Burwood Highway, Burwood, VIC, Australia 3125.*

<sup>4</sup>Corresponding author. Email: [mike.weston@deakin.edu.au](mailto:mike.weston@deakin.edu.au)

**Figure S1.** The association between sample size and estimates of the 95<sup>th</sup> percentile in flight initiation distances as derived from bootstrapping analyses (using 1000 randomisations) for a) bar-tailed godwit (*Limosa lapponica*), b) black swan (*Cygnus atratus*), c) dusky moorhen (*Gallinula tenebrosa*), d) Eurasian coot (*Fulica atra*), e) masked lapwing (*Vanellus miles*), f) Pacific black duck (*Anas superciliosa*), g) purple swamphen (*Porphyrio porphyrio*), h) silver gull (*Chroicocephalus novaehollandiae*) and i) superb fairy-wren (*Malurus cyaneus*). Bars represent means and error bars represent standard deviations.

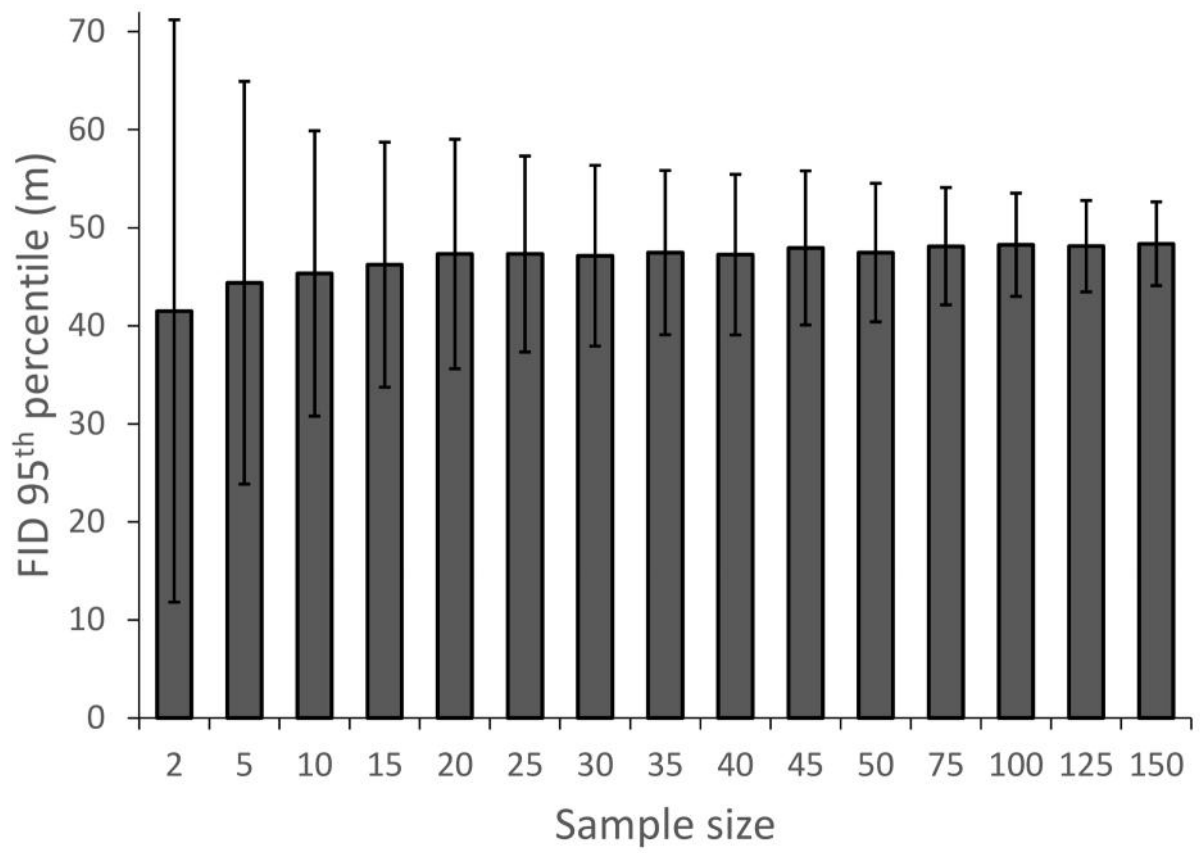

**Figure 1a.**

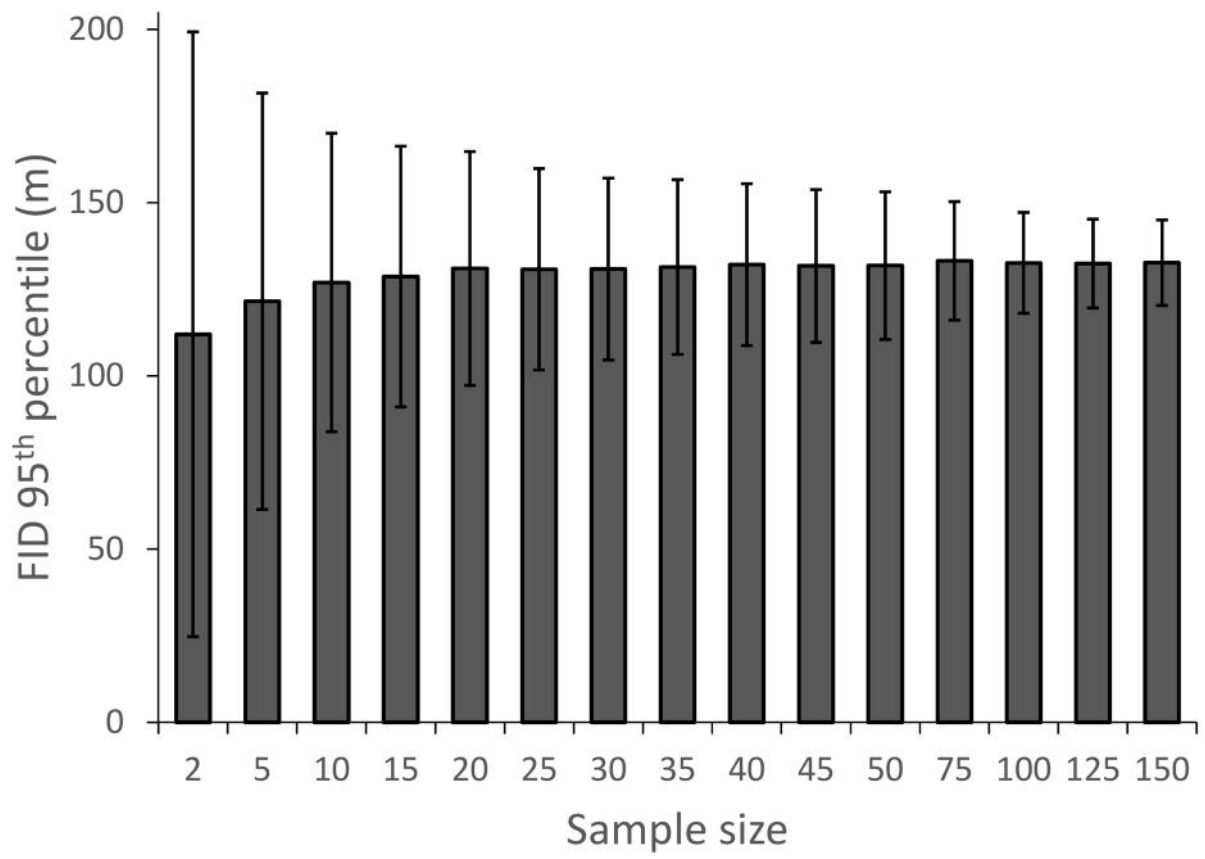

**Figure 1b.**

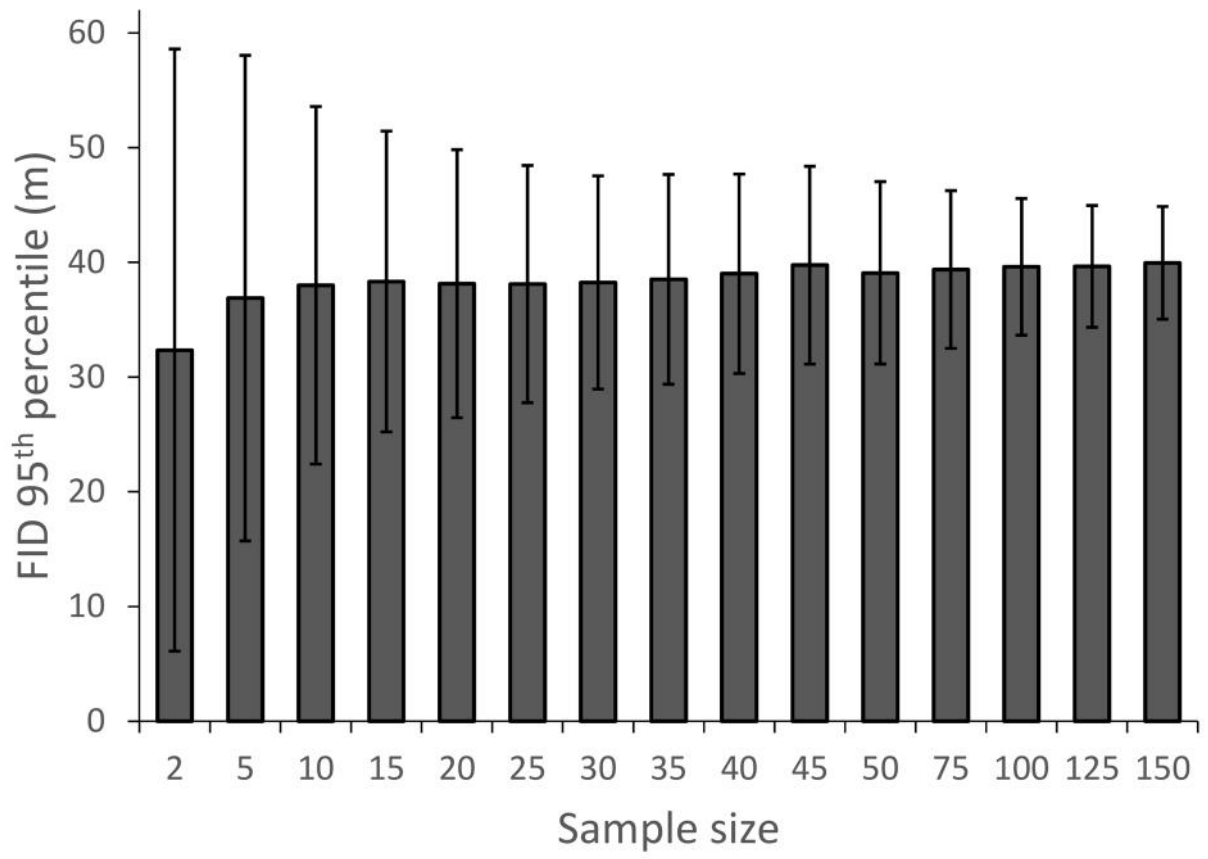

**Figure 1c.**

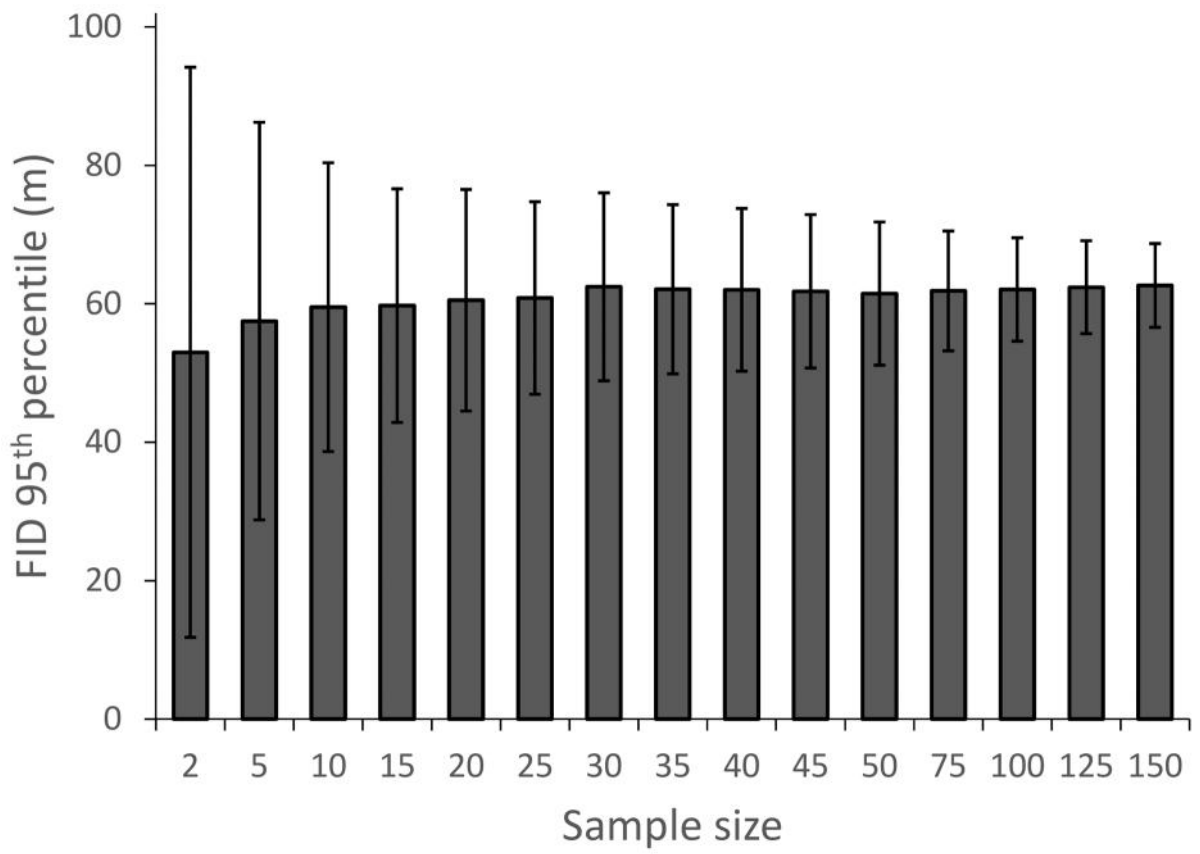

**Figure 1d.**

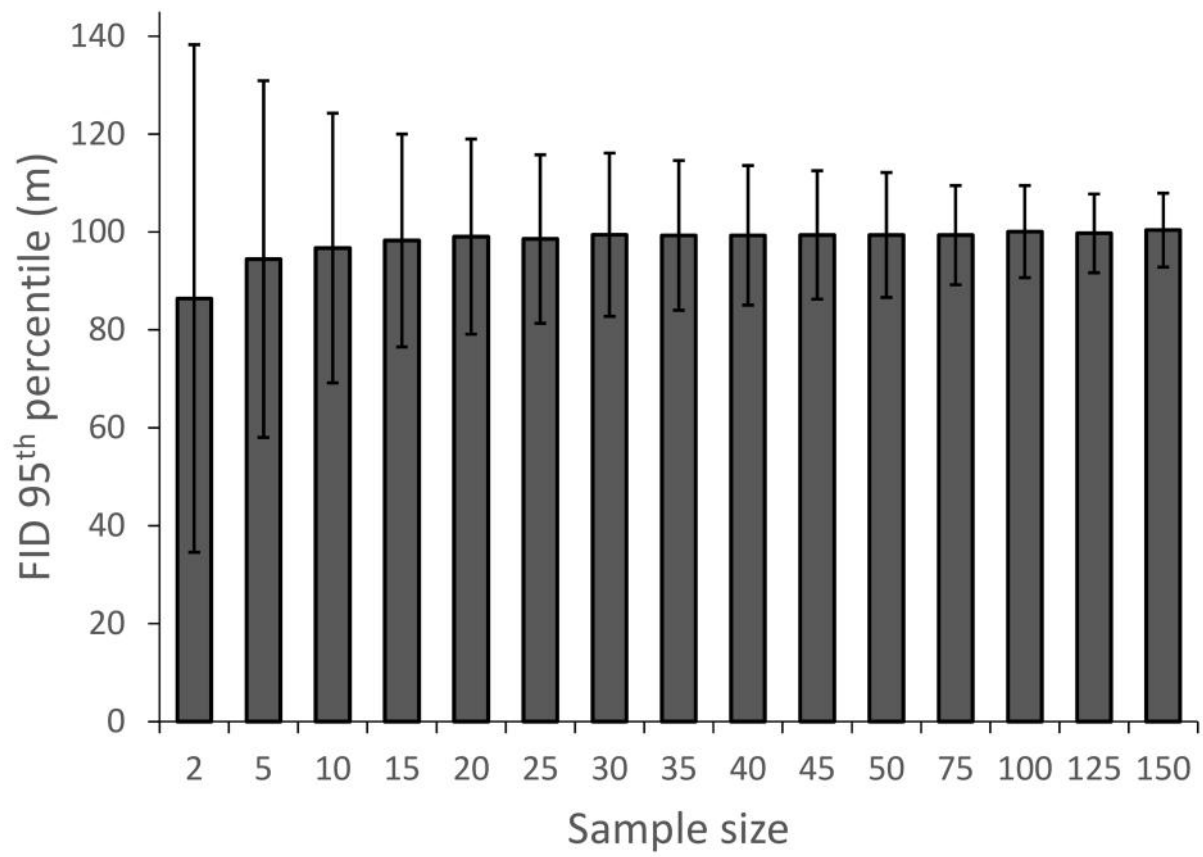

**Figure 1e.**

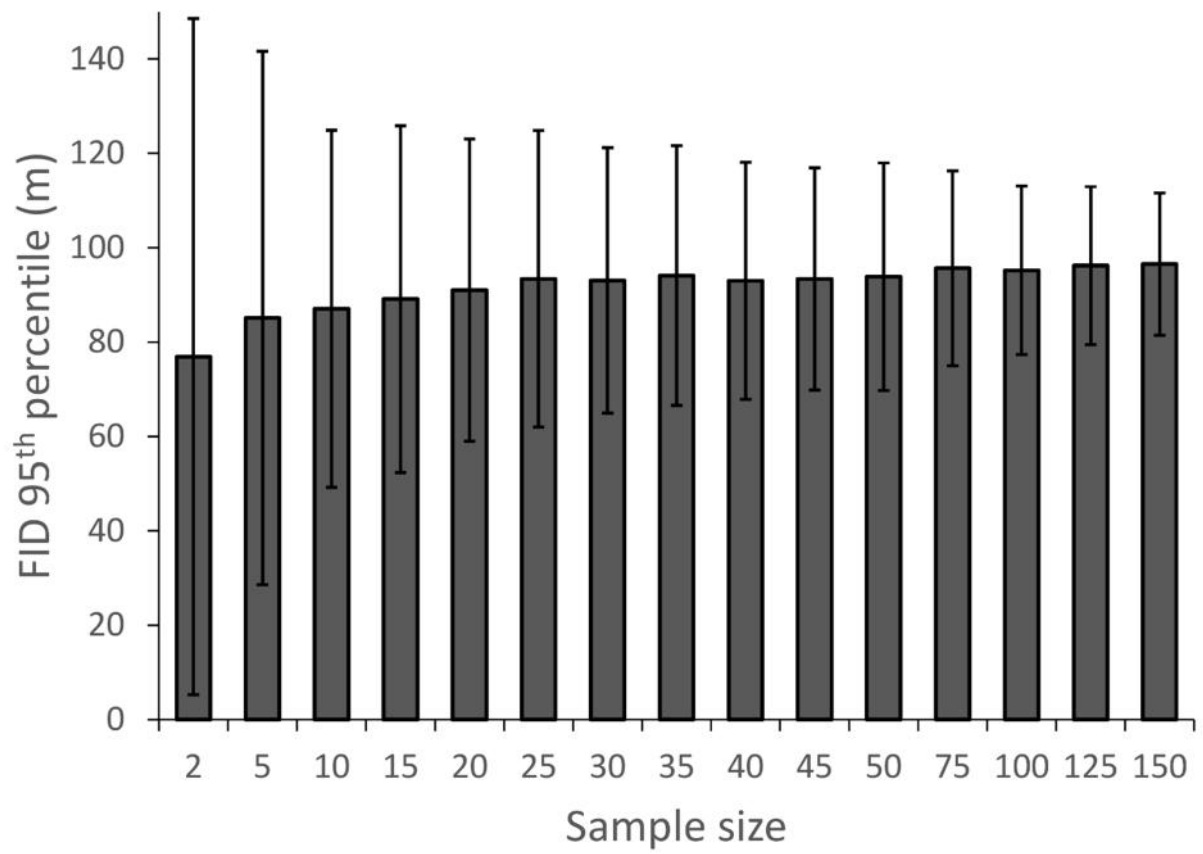

**Figure 1f.**



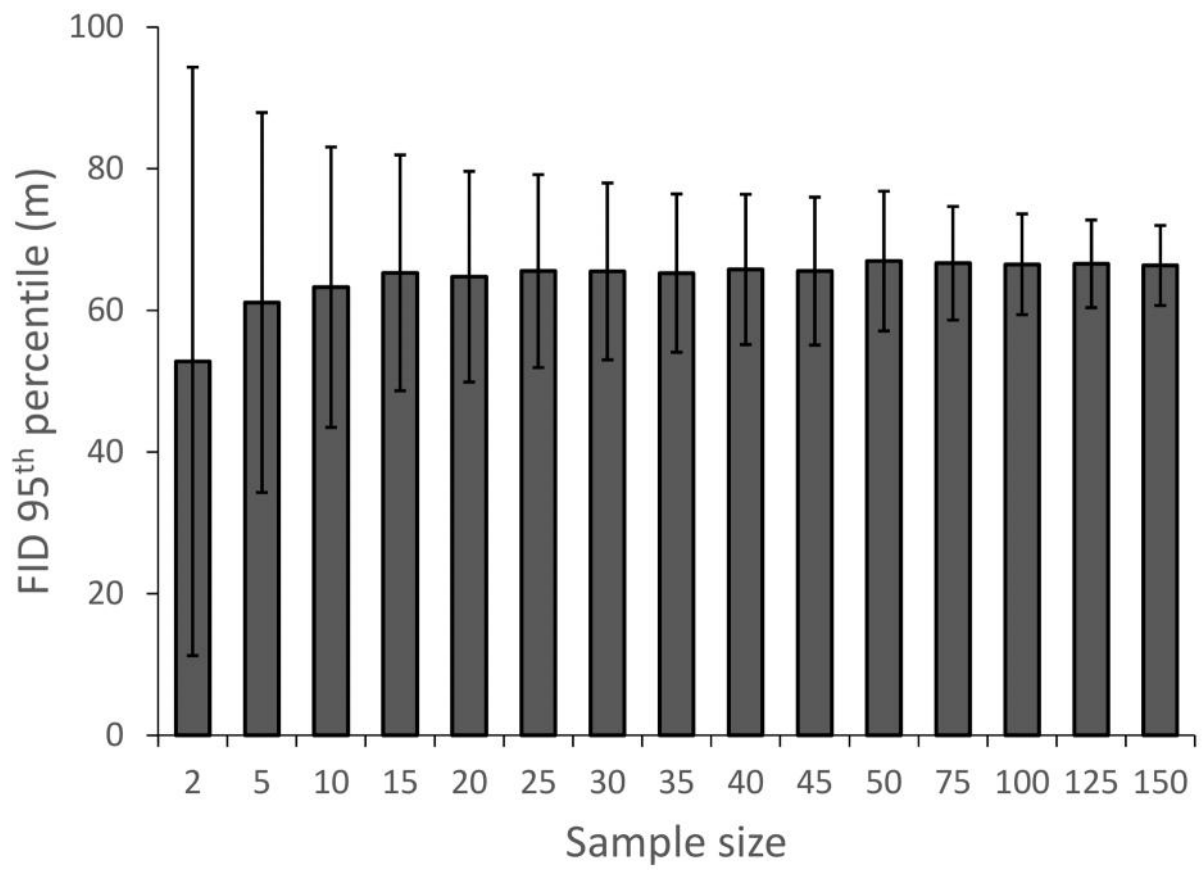

**Figure 1g.**

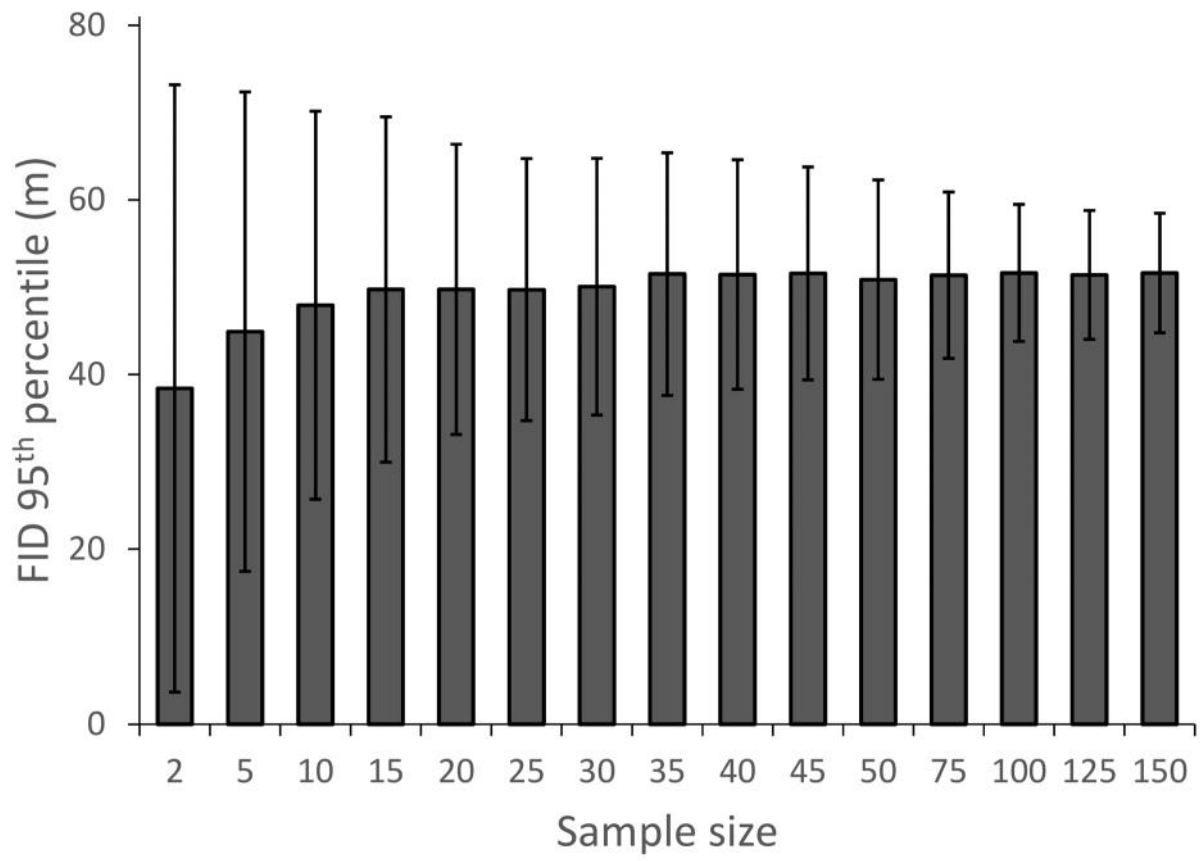

**Figure 1h.**

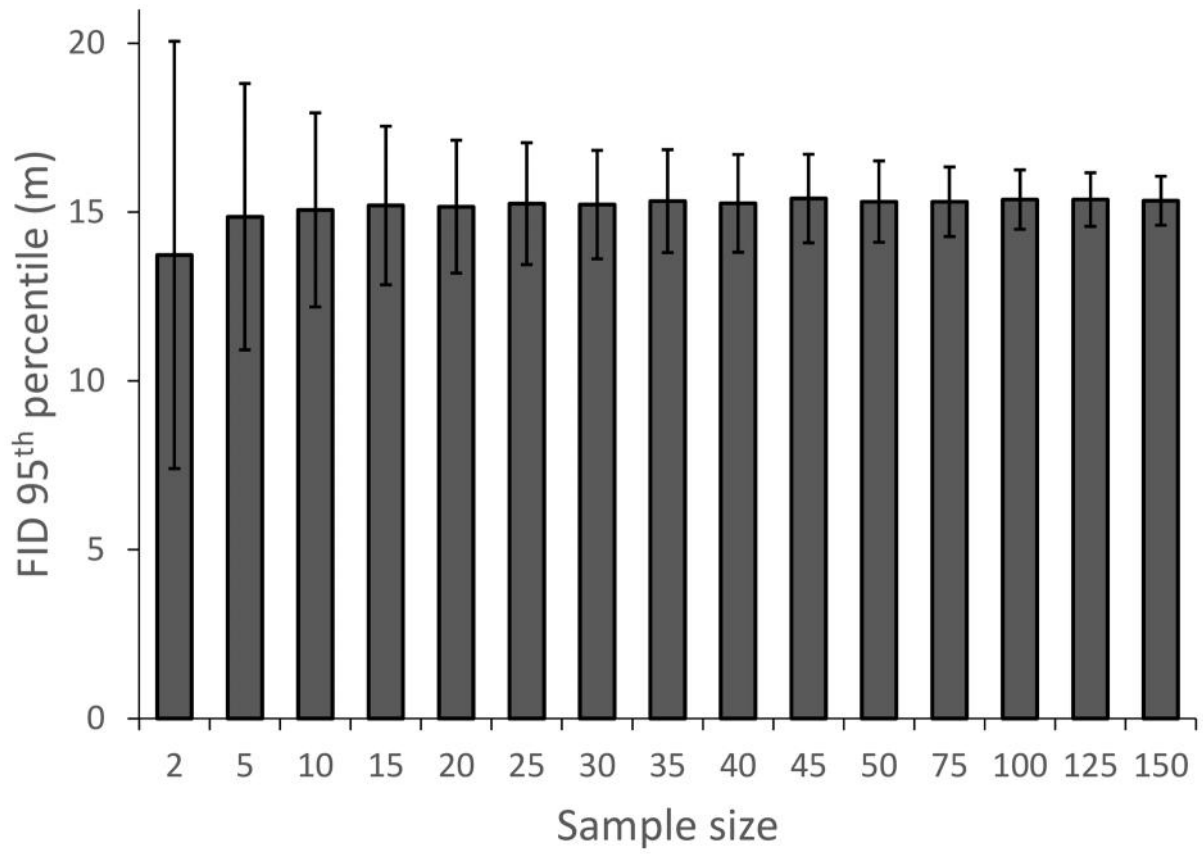

**Figure 1i.**
